# Supplementary material
Source: Springer Nature journal article supplement (https://www.springermedizin.de/resource/supplementary/12889_2012_3987_MOESM4_ESM.pdf/9491124)

**Figure 4-** Reasons for Refusal of PITC among pregnant women attending ANC in Health facilities of Gondar town -----20

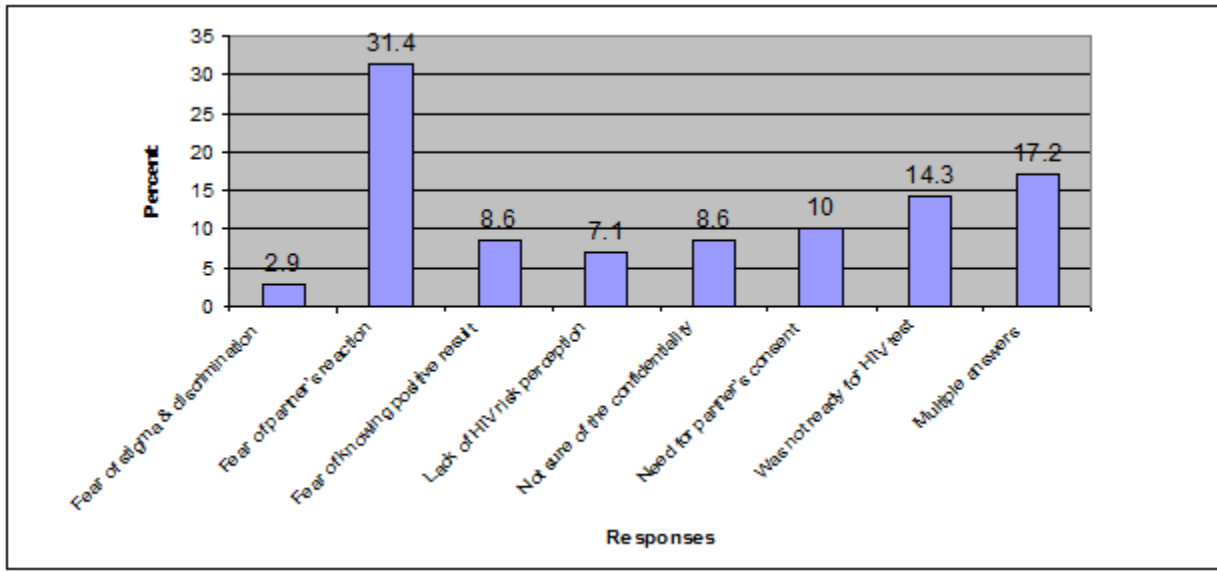

Supplement: MOESM4 [file 9491124]
